# Supplementary material for: Magnetic covalent organic framework material: synthesis and application as a sorbent for polycyclic aromatic hydrocarbons
Source: Royal Society of Chemistry journal article supplement (doi:10.1039/c8ay01572d), 2018-01-01
Supplement: c8ay01572d1.pdf [file c8ay01572d1.pdf]

## Supplementary Materials

### Magnetic covalent organic framework material: Synthesis and application as a sorbent for polycyclic aromatic hydrocarbons

#### Figure caption

**Fig. S1.** SEM images of (A)  $\text{Fe}_3\text{O}_4$  and (B)  $\text{Fe}_3\text{O}_4@\text{COF}(\text{TpDA})$ .

**Fig. S2.** The reusability of the  $\text{Fe}_3\text{O}_4@\text{COF}(\text{TpBD})$ .

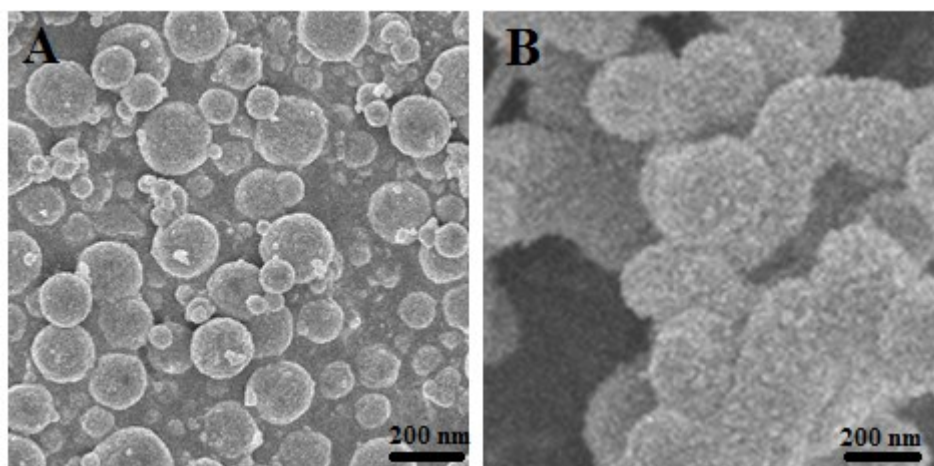

**Fig. S1.**

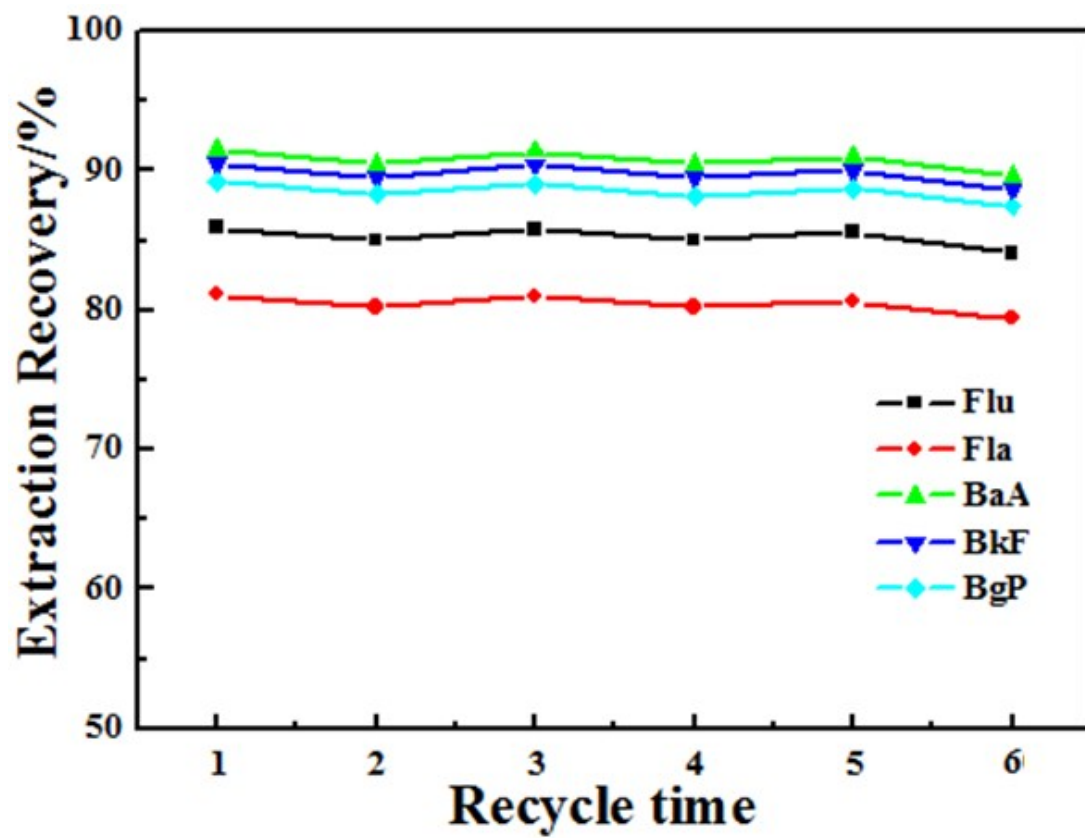

Fig. S2.
